# Supplementary material for: Vacuolar Protein-Sorting Receptor MoVps13 Regulates Conidiation and Pathogenicity in Rice Blast Fungus Magnaporthe oryzae
Source: MDPI journal article supplement (doi:10.3390/jof7121084), 2021-12-17
Supplement: s1 [file s1]

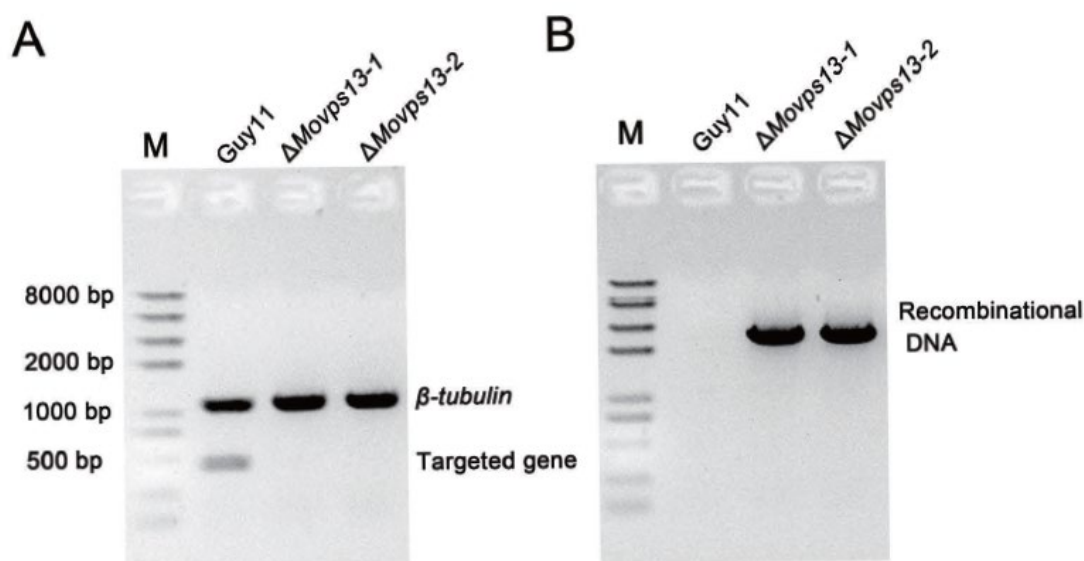

**Figure S1. The knockout strategies of MoVps13.** (A) The transformants were screened by PCR for the targeted gene using the  $\beta$ -tubulin gene as a positive control. A characteristic band was amplified from the wild-type strain, indicating the presence of targeted gene, whereas this band was absent from the null mutants. (B) The transformants were screened by PCR for a unique recombinational DNA fragment marked as a knockout event. A 1.2-2.0 kb band was amplified from the null mutants, whereas this band was absent from the wild-type strain.

**Table S1 Primers used in this study**

| Gene Name          | Sequences                                  |
|--------------------|--------------------------------------------|
| MoVps13_upF:       | AGGCTAACTGACACTCTAGAACAATGGGCTCGAAGAACTGGT |
| MoVps13_upR:       | TGTTGACCTCCACTACTTAGAAGTCAAGGCAGC          |
| MoVps13_downF:     | GGAATAGAGTAGATGGTTTAGCCCTGTGGACTGTTCT      |
| MoVps13_downR:     | CGACGGCCAGTGCCAAGCTTCTGACCCAAGCTCAACATGCC  |
| MoVps13_upyzF:     | GTGCCTTCTCTGCATATT                         |
| MoVps13_innerF:    | GATCCTGCCCAGCTCAAAGTC                      |
| MoVps13_innerR:    | GCTGACGGCGCTGAATTCCTTG                     |
| MoVps13_Pkd5_GFPF: | ATCAATCACAATGGCCATGTTGGAAGGGCTTGTGGC       |
| MoVps13_Pkd5_GFPR: | CGCCCTTGCTCACCATCTCCAACGCTCTGAAGCGCCGAT    |
| Tubulin_F          | CCCATCGAAGCCCTTCGAAGG                      |
| Tubulin_R          | CTCAACGACGGTGTCGGAAACC                     |
| Sec63_Pkd5_GFPF:   | ATCAATCACAATGGCCATGAGTAGCGACTACTCATACG     |
| Sec63_Pkd5_GFPR:   | CGCCCTTGCTCACCATAGACTCATCCTCAGTGTC         |
